# Supplementary material for: Gene Characterization Index: Assessing the Depth of Gene Annotation
Source: PubMed Central journal article supplement (PMC2194620; doi:10.1371/journal.pone.0001440), 2008-01-23

**Figure S1.** Evaluator-assigned GCI score distribution

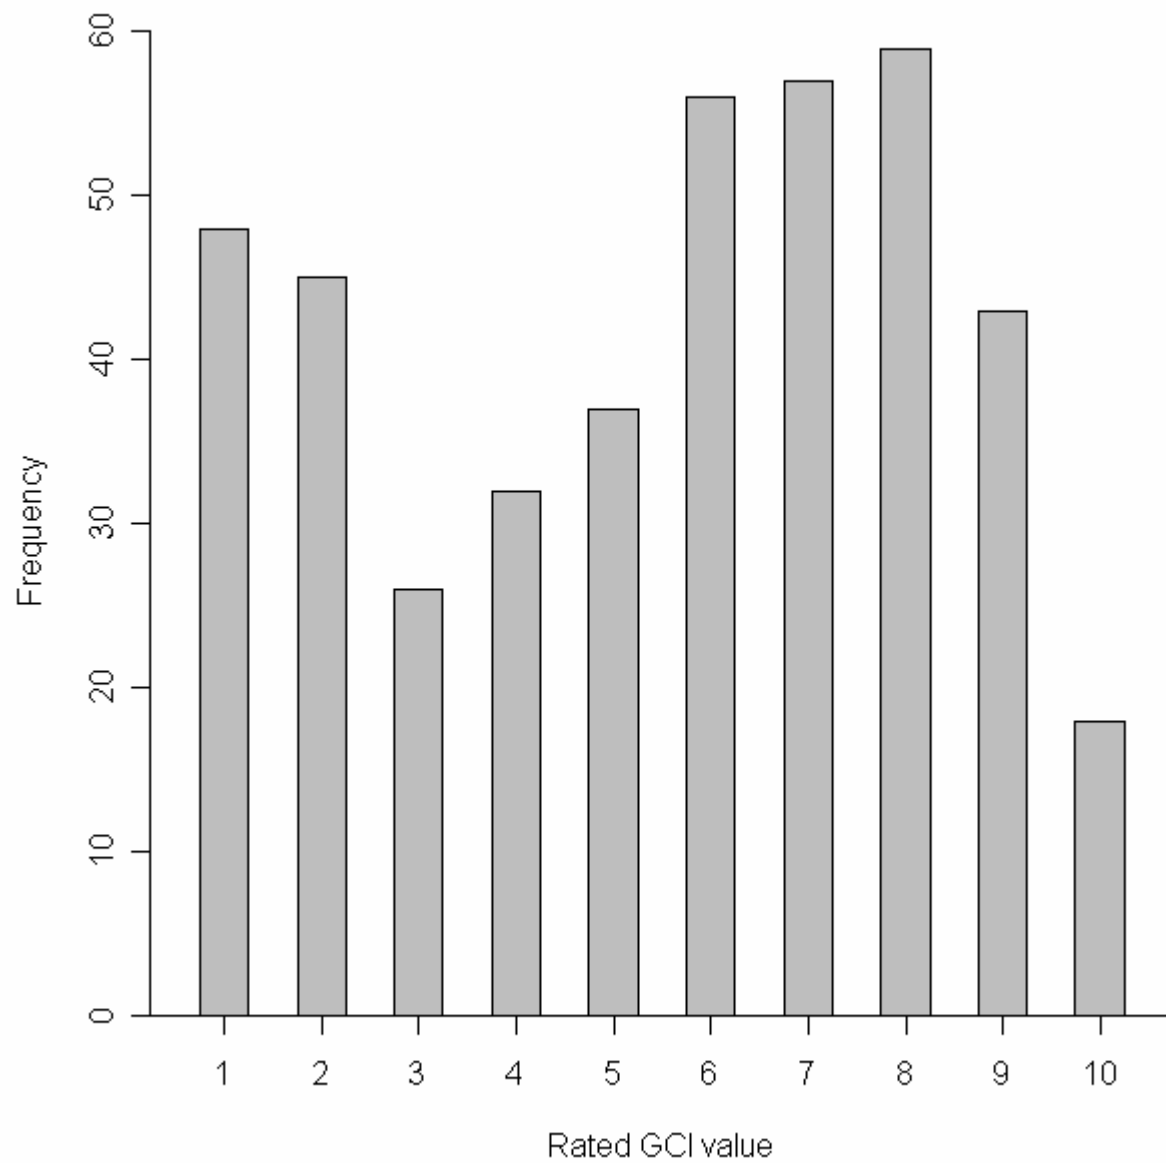

Supplement: pone.0001440.s003.pdf [file pone.0001440.s003.pdf]
